# Supplementary material for: Selective RNA Labeling by RNA-Compatible Type II Restriction Endonuclease and RNA-Extending DNA Polymerase
Source: MDPI journal article supplement (doi:10.3390/life12101674), 2022-10-21
Supplement: s1 [file s1]

Supplementary Materials

# Selective RNA Labeling by RNA-Compatible Type II Restriction Endonuclease and RNA-Extending DNA Polymerase

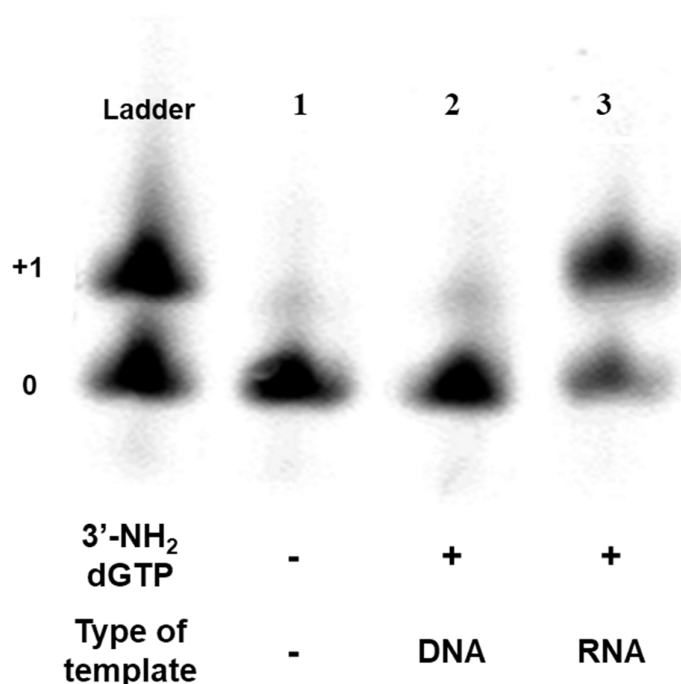

**Figure S1.** RNA primer extension using AMV RT and dGTP with 3'-NH<sub>2</sub>. Almost no elongation was observed when a DNA template was used (lane 2); however, the use of RNA template allowed 64.98 % of modified nucleotide insertion to the 3' end of the RNA (lane 3). The gel was stained by SYBR Gold.

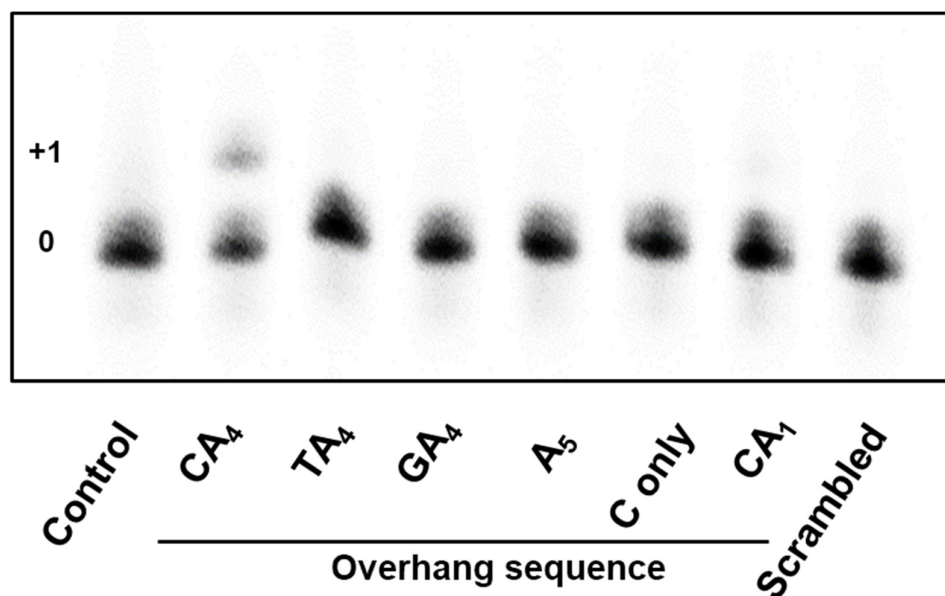

**Figure S2.** Fidelity of nucleotide addition by Klenow fragment. The sequence of 5' DNA overhangs was varied to verify the accuracy and efficiency of modified nucleotide insertion. The gel was stained by SYBR Gold.

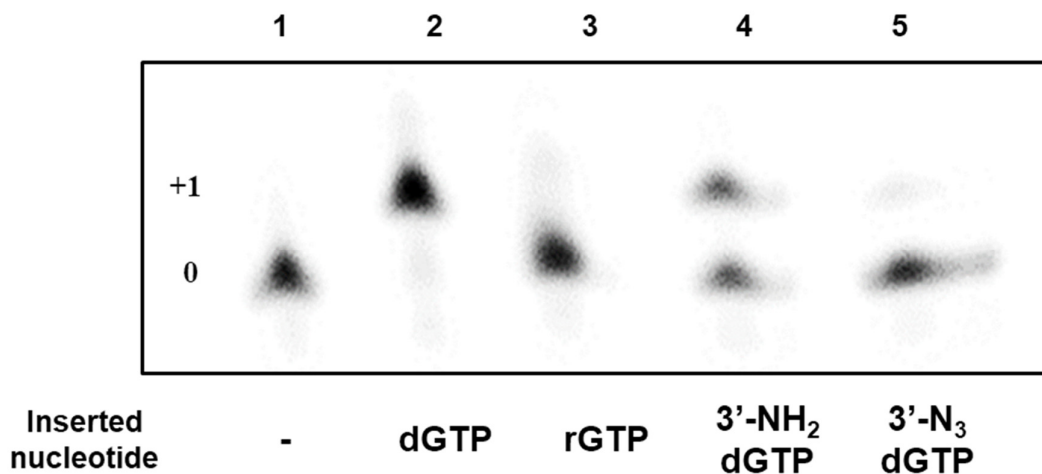

**Figure S3.** RNA labeling by Klenow fragment. Different modified nucleoside triphosphates, dGTP, rGTP, dGTP with 3'-NH<sub>2</sub>, and dGTP with 3'-N<sub>3</sub>, were used with the Klenow fragment for the insertion of modified nucleotide at 3' end of the target RNA. The gel was stained by SYBR Gold.

**Table S1.** Oligonucleotide sequence. All recognition sites of restriction endonucleases are shown in red. All RNAs except for 5' fluorescein-modified RNAs were transcribed via in vitro transcription.

| Name      | Type | Sequence                                                                                  |
|-----------|------|-------------------------------------------------------------------------------------------|
| CR        | RNA  | 5' GGU CGU CAG UGC AUU GAG AAG GAG GAU AAA AUG CAC AUA GGU CGA                            |
|           |      | AAG ACC UUA UAC AAG AAC UGU AUC ACC GGA GGG CGA CCC UAG GCU GUU<br>AUU GCC GCU CUC AUC 3' |
| cCR       | DNA  | 5' GAT GAG AGC GGC AAT AAC AGC CTA GGG TCG CCC TCC GGT G 3'                               |
| 16S-Front | RNA  | 5' GCA TTA AGC ACT CCG CCT GGG GAG TAC GAC CGC AAG GTT GAA ACT CAA                        |
|           |      | AGG AAT TGA CGG GGA CCC GCA CAA GCG GTG GA 3'                                             |

|               |     |                                                                                                                            |
|---------------|-----|----------------------------------------------------------------------------------------------------------------------------|
| cDNA_16SF     | DNA | 5' TCC ACC GCT TGT GCG <b>GGT CCC</b> CGT CAA TTC CTT TGA G 3'                                                             |
| 16S-Back      | RNA | 5' GGA AUU GAC GGG <b>GAC</b> CCG CAC AAG CGG UGG AGC AUG UGG UUU AAU<br>UCG AAG CAA CGC GAA GAA CCU UAC CAA AUC UUG AC 3' |
| cDNA_16SB     | DNA | 5' ACA TGC TCC ACC GCT TGT GCG <b>GGT CCC</b> CGT CA A TTC C 3'                                                            |
| FAM_R         | RNA | 5' [FAM]AGC GUG ACU GAC UG 3'                                                                                              |
| DNA CA4       | DNA | 5' AAA ACC AGT CAG TCA CGC T 3'                                                                                            |
| DNA TA4       | DNA | 5' AAA ATC AGT CAG TCA CGC T 3'                                                                                            |
| DNA GA4       | DNA | 5' AAA AGC AGT CAG TCA CGC T 3'                                                                                            |
| DNA A5        | DNA | 5' AAA AAC AGT CAG TCA CGC T 3'                                                                                            |
| DNA Conly     | DNA | 5' CCA GTC AGT CAC GCT 3'                                                                                                  |
| DNA CA1       | DNA | 5' ACC AGT CAG TCA CGC T 3'                                                                                                |
| DNA scrambled | DNA | 5' AAA ACC CGA TCG ACT CGA T 3'                                                                                            |
| RNA_18        | RNA | 5' [FAM]ACA AGA UCA GUC UUU UUU 3'                                                                                         |
| RNA_15        | RNA | 5' [FAM]AGC GUG ACU GAC UGG 3'                                                                                             |
| RNA_13        | RNA | 5' [FAM]AAA AAC CAU AUG G 3'                                                                                               |
| cDNA_RNA15    | DNA | 5' CCA CCT GTC AGT CAC GCT 3'                                                                                              |
| cDNA_AAA      | DNA | 5' AAA CCC GTC AAT TCC TTT GAG TTT CAA CCT TGC GC 3'                                                                       |
